# Supplementary material
Source: PubMed Central journal article supplement (PMC5473248)
Supplement: 10.1074_M117.787119_jbc.M117.787119-1.pdf [file 10.1074_M117.787119_jbc.M117.787119-1.pdf]

**Table S1 | Summary of drug targets and observed effect.**

| <b>Drug</b>                  | <b>Target</b>                        | <b>Molecular Function</b> | <b>Observed Effect on <math>\beta_2</math>AR <math>Ca^{2+}</math> signal</b> |
|------------------------------|--------------------------------------|---------------------------|------------------------------------------------------------------------------|
| <b><i>Norepinephrine</i></b> | All ARs                              | Agonist                   | Calcium mobilization                                                         |
| <b><i>Epinephrine</i></b>    | All ARs                              | Agonist                   | Calcium mobilization                                                         |
| <b><i>Isoproterenol</i></b>  | All ARs                              | Agonist                   | Calcium mobilization                                                         |
| <b><i>Terbutaline</i></b>    | All ARs                              | Agonist                   | Calcium mobilization                                                         |
| <b><i>Prazosin</i></b>       | $\alpha_1$ ARs                       | Antagonist                | No inhibition                                                                |
| <b><i>Yohimbine</i></b>      | $\alpha_{1/2}$ ARs                   | Antagonist                | No inhibition                                                                |
| <b><i>Propranolol</i></b>    | $\beta_1$ and $\beta_2$ ARs          | Antagonist                | Suppression                                                                  |
| <b><i>ICI 118,551</i></b>    | $\beta_2$ AR                         | Antagonist                | Suppression                                                                  |
| <b><i>ATP</i></b>            | P <sub>2</sub> YR                    | Agonist                   | N/A                                                                          |
| <b><i>8-bromo-cAMP</i></b>   | PKA                                  | Activator                 | No $Ca^{2+}$ mobilization                                                    |
| <b><i>H-89</i></b>           | PKA                                  | Inhibitor                 | No suppression                                                               |
| <b><i>KT 5720</i></b>        | PKA                                  | Inhibitor                 | No suppression                                                               |
| <b><i>IBMX</i></b>           | PDE                                  | Inhibitor                 | No effect                                                                    |
| <b><i>ddAd</i></b>           | AC                                   | Inhibitor                 | No effect                                                                    |
| <b><i>SQ 22,536</i></b>      | AC                                   | Inhibitor                 | No effect                                                                    |
| <b><i>DAMGO</i></b>          | $\mu$ OR ( $G_{ai/o}$ coupled)       | Agonist                   | No effect                                                                    |
| <b><i>CTX</i></b>            | $G_{as}$                             | Activator                 | No $Ca^{2+}$ mobilization                                                    |
| <b><i>PTX</i></b>            | $G_{ai/o}$                           | Inhibitor                 | No inhibition                                                                |
| <b><i>EGTA</i></b>           | $Ca^{2+}$                            | Chelator                  | No suppression of peak response                                              |
| <b><i>TG</i></b>             | SERCA-ATPase pump on ER membrane     | Deplete ER of $Ca^{2+}$   | Suppression                                                                  |
| <b><i>U73122</i></b>         | PLC                                  | Inhibitor                 | Suppression                                                                  |
| <b><i>2-APB</i></b>          | InsP <sub>3</sub> R                  | Inhibitor                 | Suppression                                                                  |
| <b><i>Carbachol</i></b>      | M <sub>3</sub> R ( $G_{oq}$ coupled) | Agonist                   | N/A                                                                          |

**Figure S1**

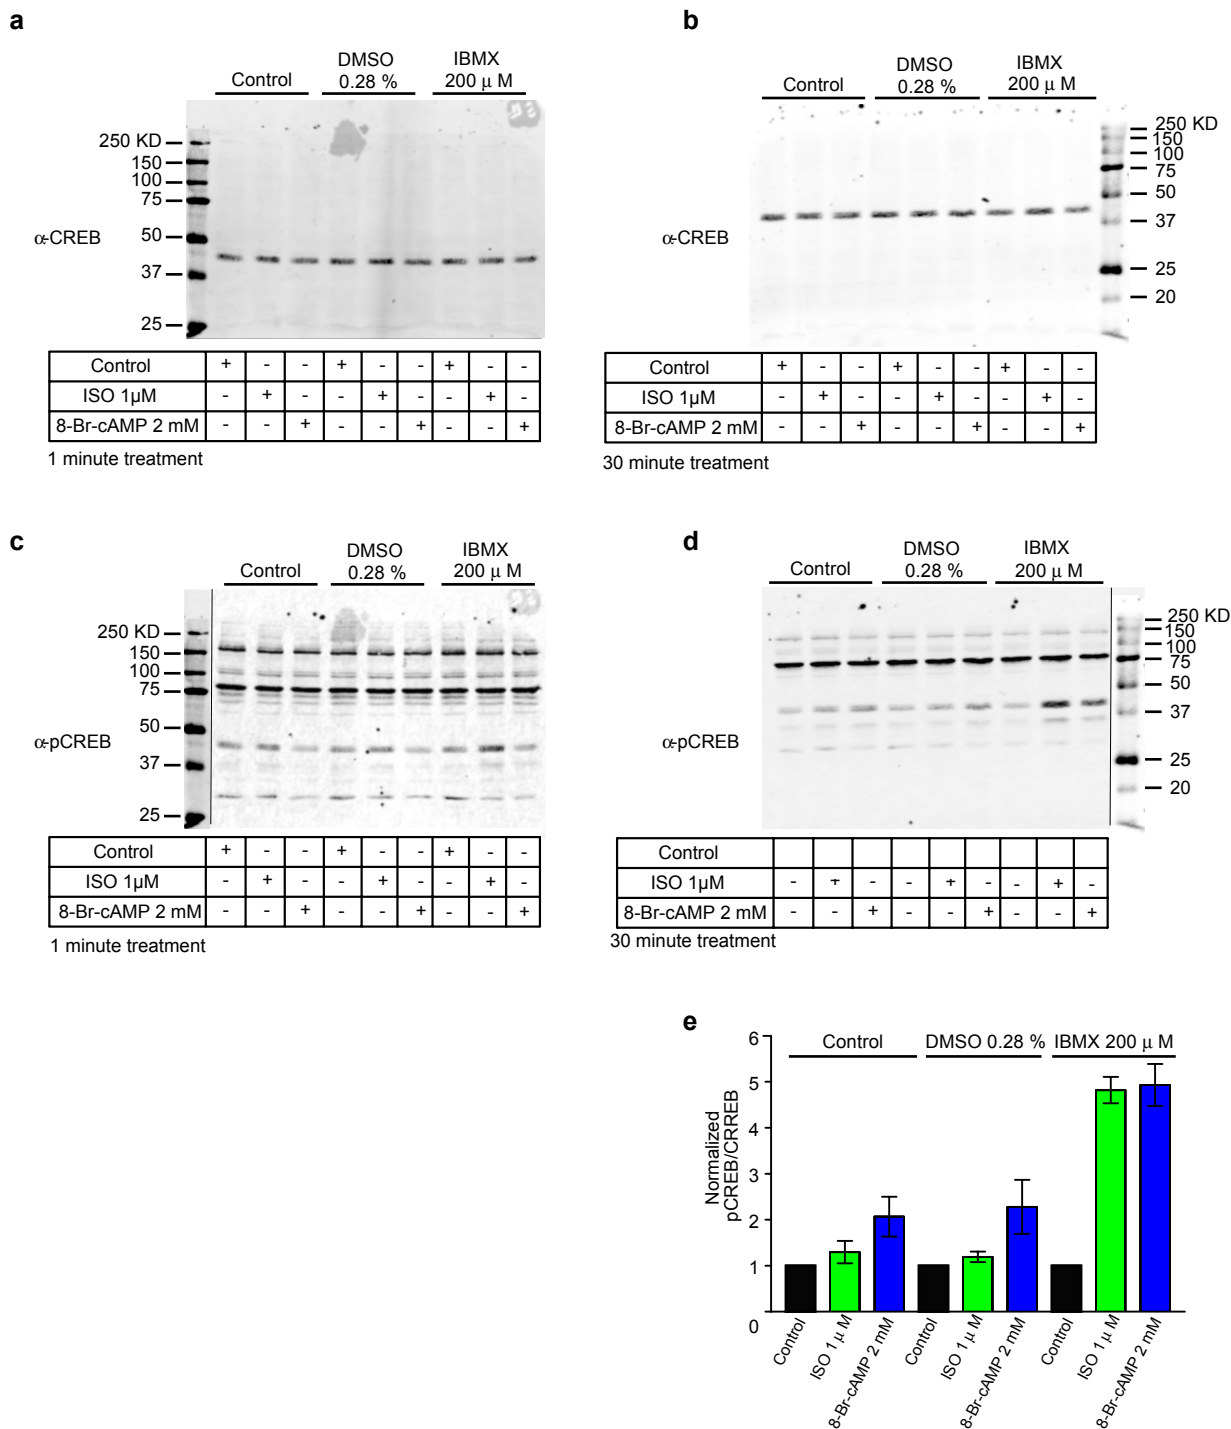

**Supplemental Figure S1 | Full western blot scans from figure 3.** Infrared fluorescence scans of immunoblots, each representative of three independent experiments. a,b) staining for total CREB (43 kDa) after 1 and 30 minutes treatment with ISO and 8-Br-cAMP. c,d) staining for pCREB (43 kDa) after 1 and 30 minutes treatment with ISO and 8-Br-cAMP. e) pCREB/CREB ratios normalized to control averaged from 3 independent experiments following treatments with ISO and 8-Br-cAMP for 30 minutes. Bar graphs are averages of three or more independent experiments, error bars indicate SEM. Panels a and c are from the same gel, as are panels c and d, and in each case an image of the  $M_r$  marker lane imaged using the optics for the dye used to detect total CREB in panel a or b is pasted adjacent to the images of the lanes containing the samples for each gel.
